# Supplementary material for: Changes in period and cohort effects on haematological cancer mortality in Spain, 1952-2006
Source: BMC Cancer. 2014 Apr 10;14:250. doi: 10.1186/1471-2407-14-250 (PMC4021557; doi:10.1186/1471-2407-14-250)
Supplement: Additional file 1: Table S1 — Codes for haematological cancers from successive revisions of the International Classification of Diseases in Spain over the period 1952-2006. [file 1471-2407-14-250-S1.pdf]

**Supplementary Table S1 Codes for haematological cancers from successive revisions of the International Classification of Diseases in Spain over the period 1952–2006**

| <b>Haematological cancer</b> | <b>Revision of the International Classification of Diseases (period)</b> |                        |                        |                         |
|------------------------------|--------------------------------------------------------------------------|------------------------|------------------------|-------------------------|
|                              | <b>6–7th (1952–1967)</b>                                                 | <b>8th (1968–1979)</b> | <b>9th (1980–1998)</b> | <b>10th (1999–2006)</b> |
| Hodgkin’s disease            | 201                                                                      | 201                    | 201                    | C81                     |
| Non-Hodgkin’s lymphoma       | 200, 202                                                                 | 200, 202               | 200, 202               | C82–C85, C96            |
| Multiple myeloma             | 203                                                                      | 203                    | 203                    | C90                     |
| Leukaemia                    | 204                                                                      | 204–207                | 204–208                | C91–C95                 |
